# Supplementary material for: Nanoscale Remodeling of Functional Synaptic Vesicle Pools in Hebbian Plasticity
Source: PubMed Central journal article supplement (PMC7016504; doi:10.1016/j.celrep.2020.01.051), 2020-02-11
Supplement: mmc1.pdf [file mmc1.pdf]

**Cell Reports, Volume 30**

**Supplemental Information**

**Nanoscale Remodeling of Functional  
Synaptic Vesicle Pools in Hebbian Plasticity**

**Stephanie Rey, Vincenzo Marra, Catherine Smith, and Kevin Staras**

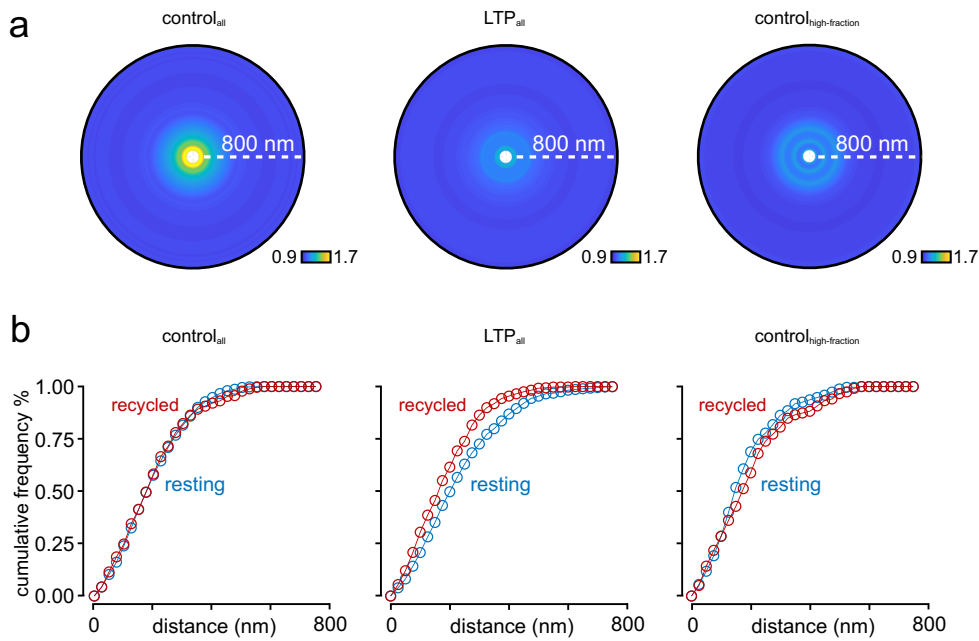

**Figure S1. Comparing properties of LTP synapses to the subset of control synapses with comparable pool fractions ( $\text{control}_{\text{high-fraction}}$ ). Related to Figures 3 and 4. (a) Mean circular frequency density plots showing relative PC+ clustering, normalized to final recycling fraction for the whole cluster for  $\text{control}_{\text{all}}$  (left),  $\text{LTP}_{\text{all}}$  (middle) and  $\text{control}_{\text{high-fraction}}$  (right). (b) Cumulative distance plots for  $\text{control}_{\text{all}}$  (left),  $\text{LTP}_{\text{all}}$  (middle) and  $\text{control}_{\text{high-fraction}}$  (right).**
